# Supplementary material for: TFAP2C Knockdown Sensitizes Bladder Cancer Cells to Cisplatin Treatment via Regulation of EGFR and NF-κB
Source: MDPI journal article supplement (doi:10.3390/cancers14194809), 2022-09-30
Supplement: s1 [file s1]

**Supplementary Materials:** The following supporting information can be downloaded at: [www.mdpi.com/xxx/s1](http://www.mdpi.com/xxx/s1), Figure S1-2

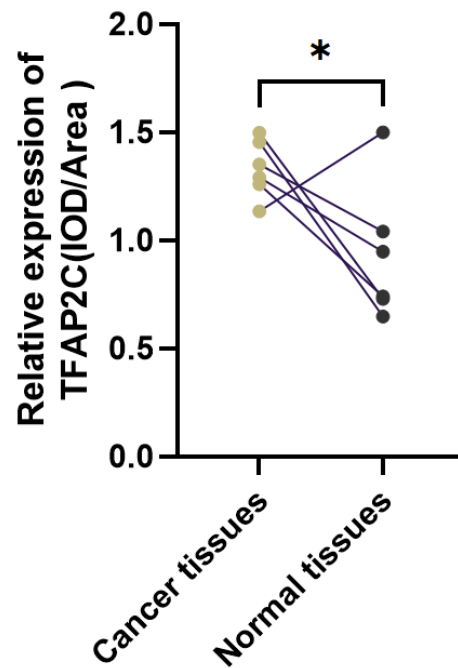

**Figure S1:** Quantitative analysis of protein expression levels. Six paired BCa tissues and adjacent tissues were used for immunohistochemistry. (\* $P < 0.05$ , \*\* $P < 0.01$ , \*\*\* $P < 0.001$ , ns, not significant.)

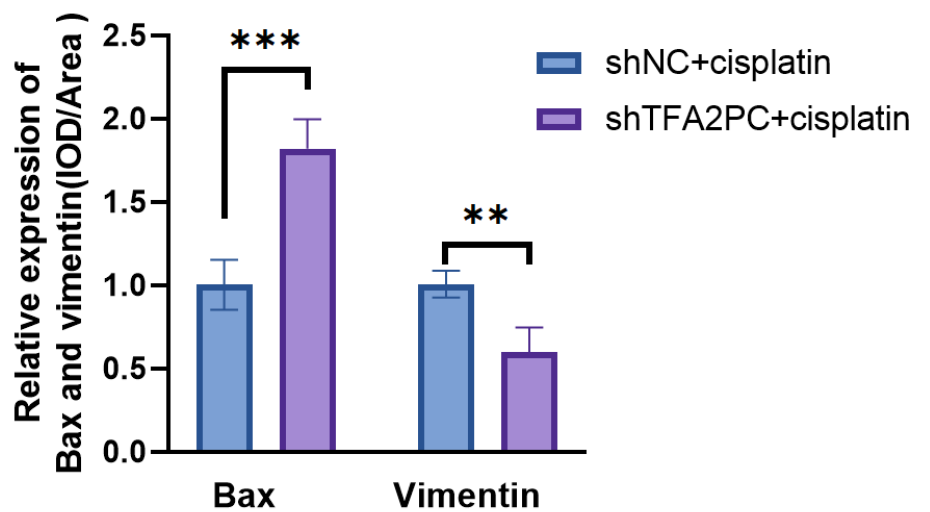

**Figure S2:** Quantitative analysis of protein expression levels. shTFAP2C+cisplatin group had a higher level of Bax and lower level of vimentin than shNC+cisplatin group. (\* $P < 0.05$ , \*\* $P < 0.01$ , \*\*\* $P < 0.001$ , ns, not significant.)
